# Supplementary material for: An efficient noble metal-free Ce–Sm/SiO2 nano-oxide catalyst for oxidation of benzylamines under ecofriendly conditions
Source: Royal Society of Chemistry journal article supplement (doi:10.1039/c4ra04397a), 2014-01-01
Supplement: c4ra04397a1.pdf [file c4ra04397a1.pdf]

## **Electronic Supplementary Information**

### **An efficient noble metal-free Ce-Sm/SiO<sub>2</sub> nano-oxide catalyst for oxidation of benzylamines under ecofriendly conditions**

**Putla Sudarsanam, A. Rangaswamy and Benjaram M. Reddy\***

Inorganic and Physical Chemistry Division, CSIR–Indian Institute of Chemical Technology  
Uppal Road, Hyderabad – 500 007, India

\*Author to whom correspondence should be addressed. Phone: +91 40 2719 3510. Fax: +91 40 2716 0921. E-mail: [bmreddy@iict.res.in](mailto:bmreddy@iict.res.in), [mreddyb@yahoo.com](mailto:mreddyb@yahoo.com)

## 1. Catalyst Preparation

The SiO<sub>2</sub>-supported CeO<sub>2</sub>-Sm<sub>2</sub>O<sub>3</sub> nano-oxides with CeO<sub>2</sub>:Sm<sub>2</sub>O<sub>3</sub>:SiO<sub>2</sub> = 80:20:100 were synthesized by a facile and economical deposition coprecipitation method. In a typical procedure, colloidal SiO<sub>2</sub> (Ludox, 40 wt%, Aldrich) was dispersed in deionized water and stirred for 2 h. The desired amounts of Ce(NO<sub>3</sub>)<sub>3</sub>·6H<sub>2</sub>O (Aldrich, AR grade) and Sm(NO<sub>3</sub>)<sub>3</sub>·6H<sub>2</sub>O (Aldrich, AR grade) were dissolved in deionised water under mild stirring conditions and then the resultant Ce–Sm nitrate solution was added to the aforesaid SiO<sub>2</sub> support solution under mild stirring conditions. Subsequently, aq. NH<sub>3</sub> solution was added drop-wise to the above mixture solution until it reaches an appropriate pH (~8.5) and the resulting slurry was filtered off. The obtained cake was oven dried at 383 K for 12 h and finally calcined at 773 K for 5 h at a heating rate of 5 K min<sup>-1</sup> in dry air. For comparison, CeO<sub>2</sub>-Sm<sub>2</sub>O<sub>3</sub> (80:20 mole ratio based on oxides) and pristine CeO<sub>2</sub> were also prepared following the same procedure under identical conditions.

## 2. Catalyst Characterization

The powder XRD patterns were recorded on a Rigaku diffractometer using Cu K $\alpha$  radiation (1.540 Å), operated at 40 kV and 40 mA. The diffractograms were recorded in the 2 $\theta$  range of 10-80° with a 2 $\theta$  step size of 0.02° and a step time of 2.4 s. The XRD phases present in the solid solution were identified with the help of a Powder Diffraction File-International Center for Diffraction Data (PDF-ICDD). The average crystallite size of the ceria samples were calculated by means of Scherrer equation and the lattice parameter was estimated by a standard cubic indexation method using the intensity of the most prominent peak (111).

$$\text{Scherrer equation: } D = k\lambda/\beta \cos\theta$$

D = average crystallite size; k = constant value various from 0.98 to 1.39;  $\lambda$  = wavelength of X-rays;  $\beta$  = FWHM of a particular hkl plane;  $\theta$  = angle (radians)

The BET surface area of the ceria-based materials was determined by means of N<sub>2</sub> adsorption on a Micromeritics Gemini 2360 instrument. Prior to analysis, the samples were oven-dried at 423 K for 12 h and flushed with Argon gas for 2 h to remove any surface adsorbed residues. Surface area was calculated by utilizing the desorption data. A Horiba Jobin-Yvon HR800 Raman spectrometer equipped with a liquid-nitrogen cooled charge coupled device (CCD) detector and a confocal microscope was used for obtaining the Raman spectra of the

samples. The emission line at 638-nm from Ar<sup>+</sup> laser (Spectra Physics) was focused on the sample under the microscope with the diameter of the analyzed spot being ~1 μm, under the ambient conditions. The time of acquisition was adjusted according to the intensity of Raman scattering. The wavenumber values reported from the spectra are accurate to within 2 cm<sup>-1</sup>. The FT-IR spectra were recorded on a Nicolet 740 FT-IR spectrometer at ambient conditions using KBr discs with a nominal resolution of 4 cm<sup>-1</sup> and averaging 100 spectra.

TEM-HRTEM studies were made on a JEOL JEM-2100F instrument equipped with a slow-scan CCD camera and the accelerating voltage of the electron beam was 200 kV. The preparation of samples for TEM-HRTEM analysis involved sonication in ethanol for 2-5 min followed by deposition of a drop on a copper grid. The specimen was examined under vacuum at room temperature. XPS measurements were performed on a PHI 5400 instrument with a 200 W Mg Kα probe beam. The analysis was done at room temperature and pressures were maintained in the order of less than 10<sup>-8</sup> Pa. Survey and multi-region spectra were recorded at C 1s XPS peaks.

The NH<sub>3</sub>-temperature programmed desorption experiments were carried out by using Auto-Chem 2910 instrument of Micromeritics. Approximately 30 mg of the sample was placed in a quartz tube and degassed up to 573 K under the He flow. Then the NH<sub>3</sub> gas was passed through the sample surface for 30 min followed by flushing with He gas to remove the physisorbed gas. Then, the chemisorbed amount of NH<sub>3</sub> was estimated in flowing He gas with a flow rate of 20 mL min<sup>-1</sup> from 323 to 1073 K at a heating rate of 10 K min<sup>-1</sup>.

### 3. Activity Measurements

The liquid-phase oxidation of various benzylamines was carried out using O<sub>2</sub> as the green oxidant under solvent-free conditions. Typically, 0.2 g of catalyst and 0.2 mmol of benzylamine were taken into a 10 ml three-necked flask equipped with a gas inlet and outlet, a reflux condenser, and a thermometer. Then, the reaction mixture was heated to the required temperature and O<sub>2</sub> was bubbled at a rate of 20 ml/min under 800 rpm stirring conditions. After completion of the reaction, the liquid products and the catalyst were separated by centrifugation. The products were confirmed by GC-MS equipped with a DB-5 capillary column and a flame ionization detector (FID). Samples were taken periodically during the reaction and analyzed by GC equipped with a BP-20 (wax) capillary column and a FID.

The conversion of benzylamine and selectivity of the products were calculated based on the following equations:

$$\text{Conversion (\%)} = \frac{\text{Amount of benzylamine converted (moles)}}{\text{Total amount of benzylamine taken (moles)}} \times 100$$

$$\text{Selectivity (\%)} = \frac{\text{Amount of benzylamine converted to a product (moles)}}{\text{Total amount of benzylamine converted (moles)}} \times 100$$

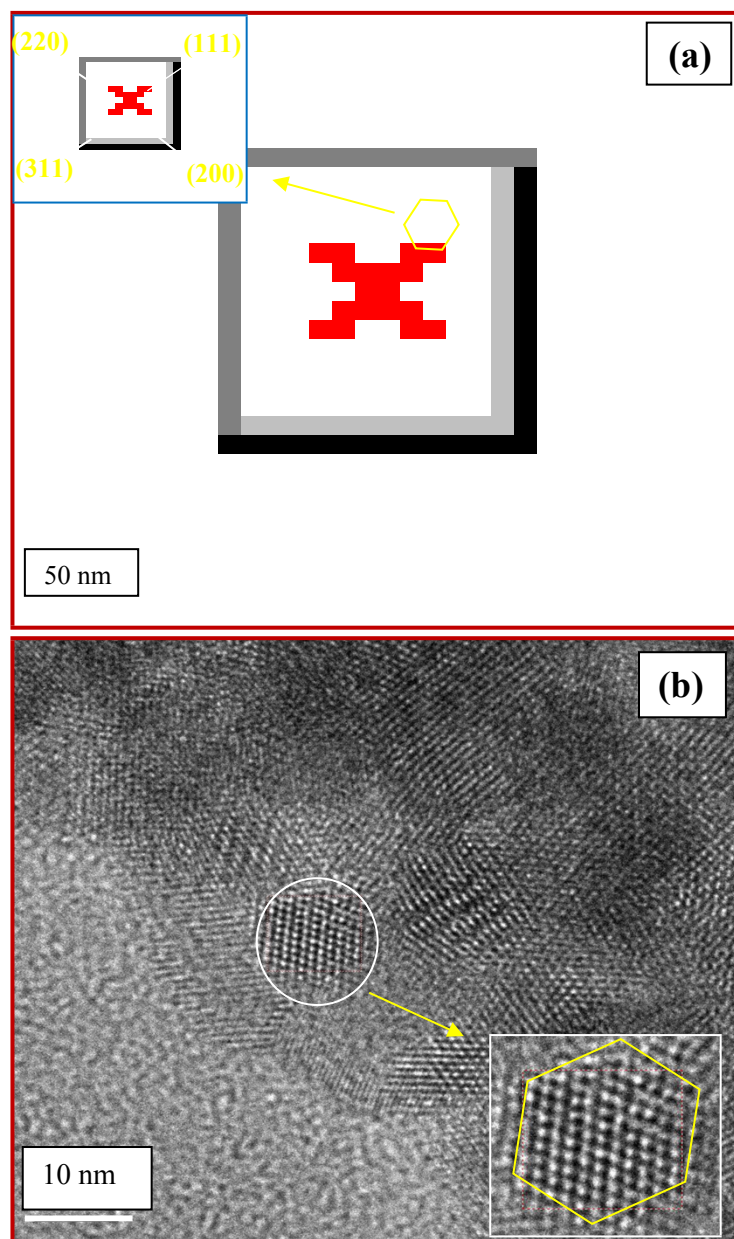

**Fig. S1** (a) TEM picture with corresponding selected-area electron diffraction (SAED) pattern and (b) HRTEM picture of  $\text{CeO}_2\text{-Sm}_2\text{O}_3$  sample (inset: enlarged views of selected areas).

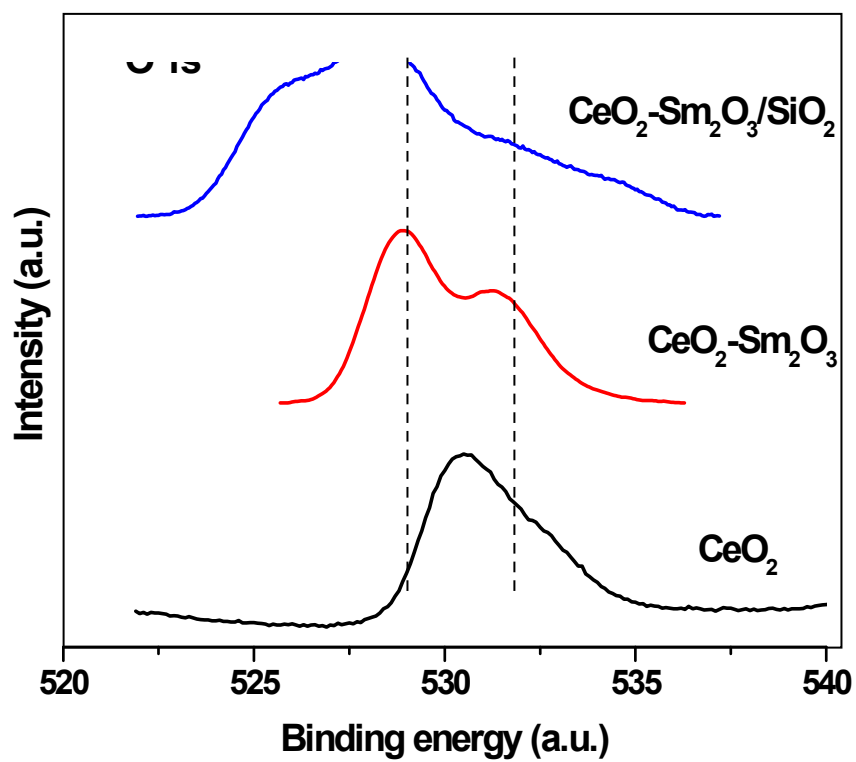

**Fig. S2** O 1s XPS spectra of CeO<sub>2</sub>-based samples calcined at 773 K.

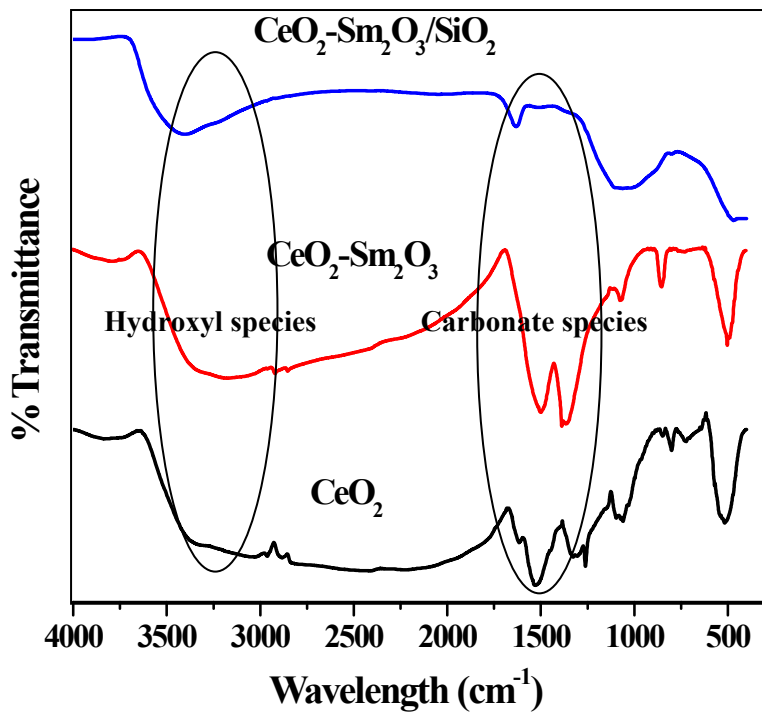

**Fig. S3** FT-IR spectra of  $\text{CeO}_2$ -based samples calcined at 773 K.

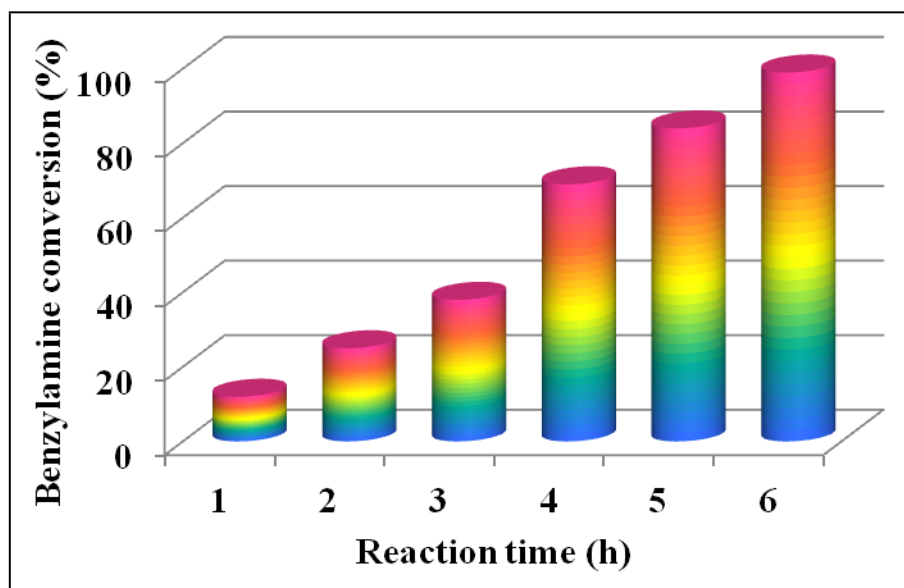

**Fig. S4** Effect of reaction time on the aerobic oxidation of benzylamine over Ce-Sm/SiO<sub>2</sub> nano-oxide catalyst.



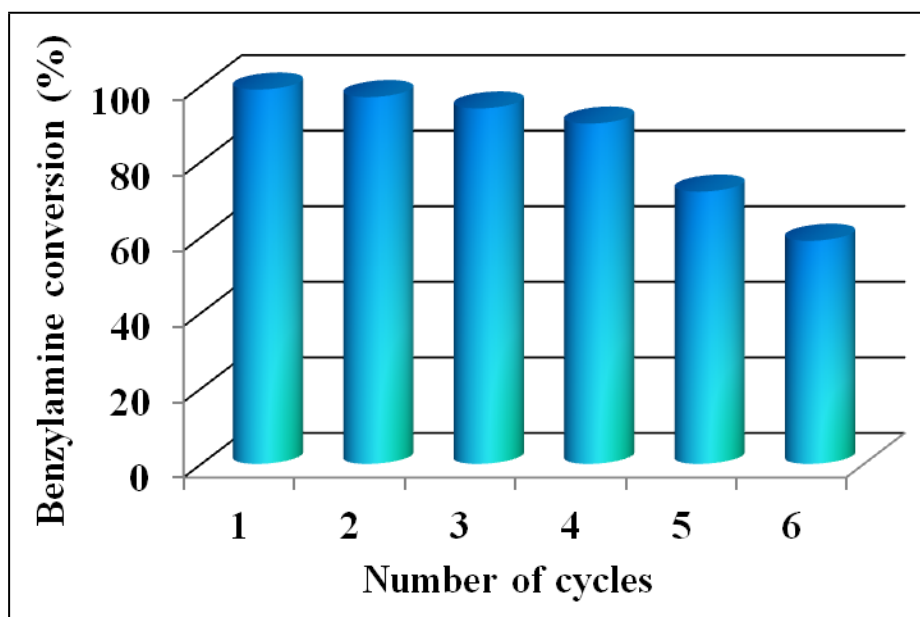

**Fig. S5** Reusability analysis of the Ce-Sm/SiO<sub>2</sub> nano-oxide catalyst for solvent-free aerobic oxidation of benzylamine.
